# Supplementary material for: Diffusion MRI–guided theta burst stimulation enhances memory and functional connectivity along the inferior longitudinal fasciculus in mild cognitive impairment
Source: PubMed Central journal article supplement — Proc Natl Acad Sci U S A. 2022 May 20;119(21):e2113778119. doi: 10.1073/pnas.2113778119 (PMC9173759; doi:10.1073/pnas.2113778119), 2022-05-20
Supplement: pnas.2113778119.sapp.pdf [file pnas.2113778119.sapp.pdf]

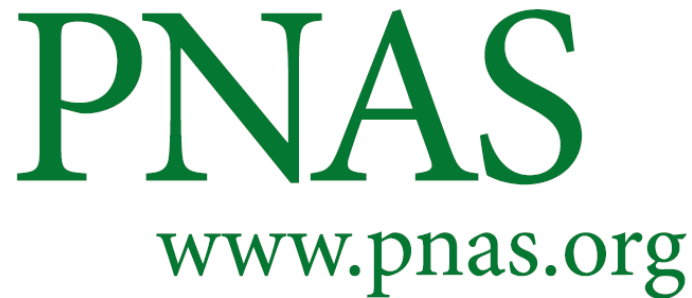

## Supplementary Information for

### **Diffusion MRI-Guided Theta Burst Stimulation Enhances Memory and Functional Connectivity along Inferior Longitudinal Fasciculus in Mild Cognitive Impairment**

Yu-Chin Chen<sup>a</sup>, Viet Ton That<sup>a</sup>, Chidi Ugonna<sup>a</sup>, Yilin Liu<sup>a</sup>, Lynn Nadel<sup>a,b\*</sup>, and Ying-hui Chou<sup>abc\*</sup>

<sup>a</sup>Brain Imaging and TMS Laboratory, Department of Psychology, University of Arizona, Tucson, USA

<sup>b</sup>Program in Cognitive Science, University of Arizona, Tucson, USA

<sup>c</sup>Evelyn F McKnight Brain Institute, Arizona Center on Aging, and BIO5 Institute, University of Arizona, Tucson, USA

\*Address correspondence to:

Lynn Nadel, Ph.D. and Ying-hui Chou, Sc.D.

Program in Cognitive Science and Department of Psychology  
University of Arizona

Ph: 520-621-7447

FAX: 520-621-9306

Email: [nadel@arizona.edu](mailto:nadel@arizona.edu); [yinghuichou@email.arizona.edu](mailto:yinghuichou@email.arizona.edu)

#### **This PDF file includes:**

Figure S1

Tables S1 – S4

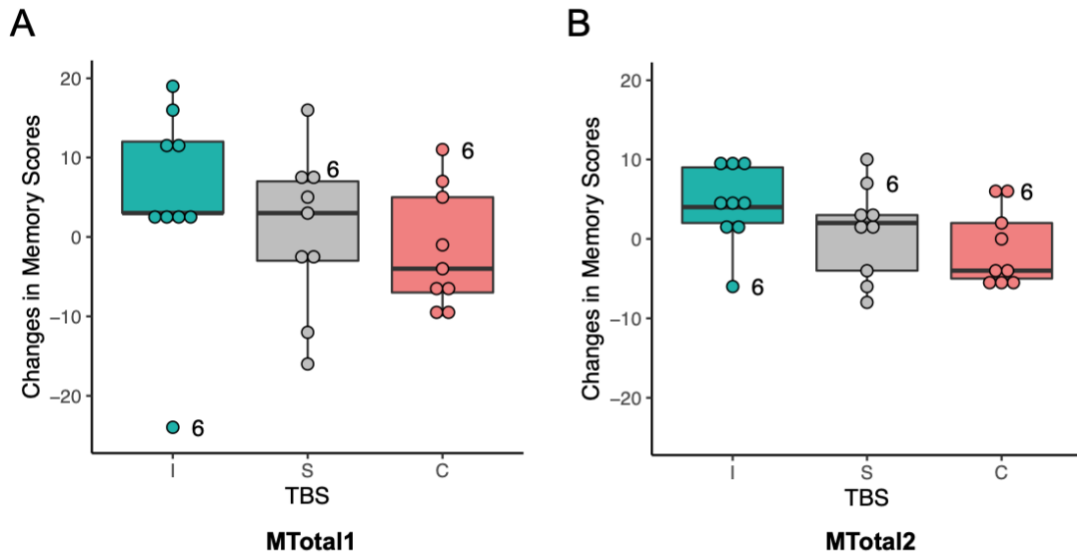

**Fig S1.** The boxplots with participant 6 did not reveal significant TBS effects on associative memory MTotal1 scores [ $F(2, 16) = 0.8, p = 0.48$ ] and MTotal2 scores [ $F(2, 16) = 2.1, p = 0.15$ ]. TBS = theta burst stimulation; I = intermittent TBS; C = continuous TBS; S = sham TBS.

**Table S1. Correlations of changes in associative memory scores following TBS (including iTBS, cTBS and sham TBS) (N=9)**

|                            | <b>MTotal1</b>             | <b>MTotal2</b>             | <b>Immediate Retrieval</b> | <b>Delayed Retrieval</b> |
|----------------------------|----------------------------|----------------------------|----------------------------|--------------------------|
| <b>MTotal1</b>             | 1                          |                            |                            |                          |
| <b>MTotal2</b>             | $r = 0.91$<br>$p < 0.0001$ | 1                          |                            |                          |
| <b>Immediate Retrieval</b> | $r = 0.83$<br>$p < 0.0001$ | $r = 0.90$<br>$p < 0.0001$ | 1                          |                          |
| <b>Delayed Retrieval</b>   | $r = 0.83$<br>$p < 0.0001$ | $r = 0.91$<br>$p < 0.0001$ | $r = 0.64$<br>$p < 0.0001$ | 1                        |

**Table S2. Changes in memory scores following TBS (N=9, including data from participant 6): Results of repeated measures ANOVA with multiple comparisons corrected by FDR**

| <b>Changes in Memory Scores (Post -Pre)</b> | <b>ANOVA (F, p)</b> | <b>iTBS (M ± S)</b> | <b>cTBS (M ± S)</b> | <b>Sham TBS (M ± S)</b> | <b>I vs. S (p and effsize)</b> | <b>C vs. S (p and effsize)</b> | <b>I vs. C (p and effsize)</b> |
|---------------------------------------------|---------------------|---------------------|---------------------|-------------------------|--------------------------------|--------------------------------|--------------------------------|
| Total memory score 1 (MTotal1)              | 0.8, 0.48           | 5.0 ± 12.6          | -1.6 ± 7.6          | 0.7 ± 10.1              | 0.51, 0.38                     | 0.51, -0.25                    | 0.51, 0.63                     |
| Total memory score 2 (MTotal2)              | 2.1, 0.15           | 4.2 ± 5.0           | -1.1 ± 4.8          | 0.9 ± 5.9               | 0.33, 0.61                     | 0.33, -0.37                    | 0.33, 1.09                     |
| Immediate Retrieval                         | 2.6, 0.11           | 2.2 ± 2.5           | -0.7 ± 2.8          | -0.2 ± 2.9              | 0.17, 0.90                     | 0.72, -0.16                    | 0.17, 1.09                     |
| Delayed Retrieval                           | 1.3, 0.31           | 2.0 ± 2.9           | -0.4 ± 2.5          | 1.1 ± 3.8               | 0.64, 0.26                     | 0.27, -0.48                    | 0.27, 0.90                     |

Note 1. effsize = effect size; TBS = theta burst stimulation; cTBS = continuous TBS; iTBS = intermittent TBS; C = cTBS; I = iTBS; S = Sham TBS.

**Table S3. Changes in functional connectivity between each participant's superficial stimulation site and other brain regions following TBS (N=9, including data from participant 6): Results of repeated measures ANOVA with multiple comparisons corrected by FDR**

| Connected regions                                | ANOVA<br>(F, p) | iTBS<br>(M ± S) | cTBS<br>(M ± S) | Sham<br>TBS<br>(M ± S) | I vs. S<br>(p and<br>effsize) | C vs. S<br>(p and<br>effsize) | I vs. C<br>(p and<br>effsize) |
|--------------------------------------------------|-----------------|-----------------|-----------------|------------------------|-------------------------------|-------------------------------|-------------------------------|
| R putamen                                        | 8.5,<br>0.003** | 0.19 ±<br>0.23  | -0.03 ±<br>0.17 | -0.13 ±<br>0.14        | 0.024*,<br>1.69               | 0.15,<br>0.61                 | 0.043,<br>1.12                |
| L occipital fusiform<br>gyrus (occipital FG)     | 7.7,<br>0.005** | 0.07 ±<br>0.27  | -0.06 ±<br>0.10 | -0.28 ±<br>0.24        | 0.017*,<br>1.41               | 0.045*,<br>1.22               | 0.20,<br>0.66                 |
| R posterior<br>parahippocampal<br>gyrus (pPHG)   | 7.4,<br>0.005** | 0.12 ±<br>0.16  | 0.00 ±<br>0.18  | -0.18 ±<br>0.20        | 0.012*,<br>1.70               | 0.11,<br>0.98                 | 0.13,<br>0.68                 |
| L insular cortex (IC)                            | 6.2,<br>0.01*   | 0.11 ±<br>0.21  | -0.09 ±<br>0.23 | -0.28 ±<br>0.26        | 0.027*,<br>1.61               | 0.14,<br>0.75                 | 0.13,<br>0.89                 |
| R occipital fusiform<br>gyrus (OFG)              | 5.8,<br>0.013*  | 0.09 ±<br>0.19  | -0.02 ±<br>0.23 | -0.25 ±<br>0.32        | 0.014*,<br>1.29               | 0.15,<br>0.83                 | 0.26,<br>0.51                 |
| R frontal orbital<br>cortex (OFC)                | 5.0,<br>0.02*   | 0.04 ±<br>0.21  | 0.05 ±<br>0.29  | -0.20 ±<br>0.19        | 0.014*,<br>1.16               | 0.048*,<br>1.02               | 0.90,<br>-0.05                |
| L frontal orbital<br>cortex (OFC)                | 5.0,<br>0.02*   | 0.04 ±<br>0.23  | 0.11 ±<br>0.30  | -0.17 ±<br>0.22        | 0.002**,<br>0.94              | 0.03*,<br>1.07                | 0.57,<br>-0.27                |
| R posterior inferior<br>temporal gyrus<br>(pITG) | 5.0,<br>0.02*   | -0.03 ±<br>0.28 | 0.20 ±<br>0.25  | -0.13 ±<br>0.28        | 0.43,<br>0.35                 | 0.038*,<br>1.23               | 0.038*,<br>-0.85              |
| R posterior middle<br>temporal gyrus<br>(pMTG)   | 4.4,<br>0.03*   | 0.09 ±<br>0.22  | 0.08 ±<br>0.21  | -0.14 ±<br>0.23        | 0.044*,<br>0.99               | 0.08,<br>0.98                 | 0.92,<br>0.04                 |
| R temporal pole<br>(TP)                          | 4.2,<br>0.035*  | 0.09 ±<br>0.32  | -0.05 ±<br>0.19 | -0.21 ±<br>0.40        | 0.035*,<br>0.85               | 0.23,<br>0.50                 | 0.23,<br>0.57                 |
| L lingual gyrus (LG)                             | 4.1,<br>0.036*  | 0.13 ±<br>0.25  | -0.07 ±<br>0.29 | -0.21 ±<br>0.25        | 0.046*,<br>1.38               | 0.24,<br>0.55                 | 0.24,<br>0.73                 |

---

|       |               |                |                |                 |                 |               |               |
|-------|---------------|----------------|----------------|-----------------|-----------------|---------------|---------------|
| L CA1 | 3.3,<br>0.063 | 0.19 ±<br>0.21 | 0.00 ±<br>0.20 | -0.05 ±<br>0.23 | 0.024*,<br>1.06 | 0.66,<br>0.22 | 0.20,<br>0.90 |
|-------|---------------|----------------|----------------|-----------------|-----------------|---------------|---------------|

---

Note 1. CA1 = Cornu Ammonis 1; effsize = effect size; TBS = theta burst stimulation; cTBS = continuous TBS; iTBS = intermittent TBS; C = cTBS; I = iTBS; S = Sham TBS.

Note 2. \* $p < 0.05$ , \*\* $p < 0.01$ .

Note 3. The brain regions were defined by the Harvard-Oxford cortical and subcortical structural atlases. The hippocampal subfields were defined by Freesurfer v6.0 segmentations.

**Table S4. Results of neuropsychological measurements of the Uniform Data Set version 3 (UDS3) neuropsychological battery and the Rey Auditory Verbal Learning Test (AVLT), adjusted for age, sex, and education (z-scores)**

| Domains                         | Task                                              | SUB  |      |      |      |      |      |      |      |      |
|---------------------------------|---------------------------------------------------|------|------|------|------|------|------|------|------|------|
|                                 |                                                   | 1    | 2    | 3    | 4    | 5    | 6    | 7    | 8    | 9    |
| General                         | MoCA total score                                  | -1.1 | -0.9 | 0.9  | -1.6 | 0.6  | -0.6 | -0.4 | -0.9 | -1.0 |
|                                 | Immediate craft story recall (verbatim scoring)   | -2.7 | 0.3  | 2.5  | 0.1  | 0.1  | 1.5  | -2.5 | -0.4 | -3.3 |
| Memory                          | Immediate craft story recall (paraphrase scoring) | -2.9 | -0.1 | 1.9  | 0.3  | 0.2  | 1.1  | -2.0 | -0.2 | -3.9 |
|                                 | Delayed craft story recall (verbatim scoring)     | -2.5 | 0.4  | 1.5  | -0.8 | 0.5  | 1.4  | -1.7 | -0.5 | -2.8 |
|                                 | Delayed craft story recall (paraphrase scoring)   | -2.8 | -0.1 | 1.4  | 0.0  | 0.2  | 0.9  | -1.4 | -0.7 | -3.5 |
|                                 | Total Score for copy of Benson figure             | 0.4  | -1.2 | 0.2  | -0.6 | 0.1  | 0.4  | 0.4  | -2.1 | -0.3 |
| Memory/<br>Visuospatial         | Total score for delayed drawing of Benson figure  | 0.1  | -1.8 | -1.7 | -0.5 | 0.5  | -0.6 | 1.0  | -0.7 | -2.6 |
|                                 | AVLT: Learning Efficiency Sum                     | -2.2 | -1.9 | 1.5  | 0.5  | 1.1  | 0.9  | -0.9 | -0.1 | -1.3 |
| Memory                          | AVLT: Delayed Recall Sum                          | -1.2 | -1.8 | 1.0  | -0.8 | 0.8  | 2.3  | -1.4 | -2.3 | -1.9 |
|                                 | AVLT: Percent Retention Sum                       | -0.1 | -1.3 | 1.0  | -1.1 | 0.1  | 1.9  | -1.6 | -2.3 | -2.2 |
|                                 | Forward number span test (correct trials)         | 0.3  | -0.9 | 1.9  | 0.2  | -0.5 | -1.2 | -0.4 | -0.4 | 1.0  |
| Attention/<br>Working<br>Memory | Forward number span test (longest span)           | 0.3  | -1.2 | 1.6  | 0.2  | -0.9 | -1.1 | -0.3 | 0.0  | 1.3  |
|                                 | Backward number span test (correct trials)        | -1.4 | -1.4 | 1.1  | -0.7 | 0.0  | 0.1  | 0.5  | -0.8 | 0.6  |

|                             |                                          |      |      |     |      |      |      |      |      |      |
|-----------------------------|------------------------------------------|------|------|-----|------|------|------|------|------|------|
| <b>Language</b>             | Backward number span test (longest span) | -1.6 | -1.6 | 0.5 | -1.0 | -0.5 | 0.1  | 0.1  | -1.2 | 0.2  |
|                             | Multilingual naming test (MINT)          | -0.1 | 1.2  | 0.5 | 0.9  | -0.2 | 0.9  | 0.3  | -0.1 | -0.1 |
|                             | Number of correct F-words generated      | -0.9 | -0.8 | 1.0 | -1.8 | -2.3 | -1.2 | -1.2 | 0.0  | -1.6 |
|                             | Number of correct L-words generated      | -1.0 | -1.1 | 2.0 | -1.2 | -1.1 | -2.2 | -0.6 | 0.6  | -0.6 |
|                             | Number of correct F-words and L-words    | -1.0 | -1.0 | 1.6 | -1.6 | -1.8 | -1.8 | -1.0 | 0.3  | -1.1 |
|                             | Category fluency (animals)               | -1.8 | -1.6 | 1.9 | -0.7 | -0.5 | -0.4 | -1.5 | -0.4 | -0.9 |
|                             | Category fluency (vegetables)            | -1.3 | -1.0 | 1.5 | 0.3  | -2.5 | -0.6 | -1.4 | -1.6 | -0.8 |
|                             |                                          |      |      |     |      |      |      |      |      |      |
| <b>Attention/ Executive</b> | Trail making test Part A                 | -1.1 | -1.2 | 0.3 | -1.1 | -1.7 | -2.2 | 0.4  | -0.7 | -1.0 |
|                             | Trail Making Test Part B                 | -1.0 | 0.6  | 0.8 | -1.6 | -0.3 | -0.6 | 0.4  | -0.8 | -5.0 |

Note 1. AVLT = The Rey Auditory-Verbal Learning Test; MoCA = The Montreal Cognitive Assessment
